# Supplementary material
Source: Springer Nature journal article supplement (https://www.springermedizin.de/resource/supplementary/13048_2013_241_MOESM6_ESM.docx/9665200)
Supplement: MOESM6 [file 9665200]

Table 1.

| **CHARACTERISTICS** | | **PERCENTAGE (*n*)** |
| --- | --- | --- |
| **Histopathologic types** | Papillary serous  Mucinous  Endometrioid  Clear cells  Poorly differentiated | 74 (37)  12 (6)  6 (3)  4 (2)  4 (2) |
| **Clinical stage**  **(FIGO stage)** | IIB  IIIC  IV | 4 (2)  52 (26)  44 (22) |
| **Age** | 20-40  41-60  61-80 | 22 (11)  56 (28)  22 (11) |
| **Family history of cancer** | YES  NO | 26 (13)  74 (37) |
